# Supplementary material
Source: HighWire-hosted journal article supplement (https://heartasia.bmj.com/highwire/filestream/136906/field_highwire_adjunct_files/0/heartasia-2013-010360supp.pdf)
Supplement: heartasia-2013-010360supp.pdf [file heartasia-2013-010360supp.pdf]

**Movie 1:** Trans-thoracic echocardiography, 1 hour after balloon mitral valvotomy (apical 4-chamber view) showing dyskinetic left ventricular apex with ballooning and hypercontractile base.

**Movie 2:** Left ventriculography, 24 hours after balloon mitral valvotomy (right anterior oblique view, using 30ml Iohexol, 15ml/minute, 5F pigtail catheter) shows apical dyskinesia with ballooning.

**Movie 3:** Trans-thoracic echocardiography, 7 days after balloon mitral valvotomy (apical 4-chamber view) shows almost normal left ventricular contraction.

**Movie 4:** Normal left ventriculography, 7 days after balloon mitral valvotomy (right anterior oblique view).
